# Supplementary material
Source: PubMed Central journal article supplement (PMC6956735)

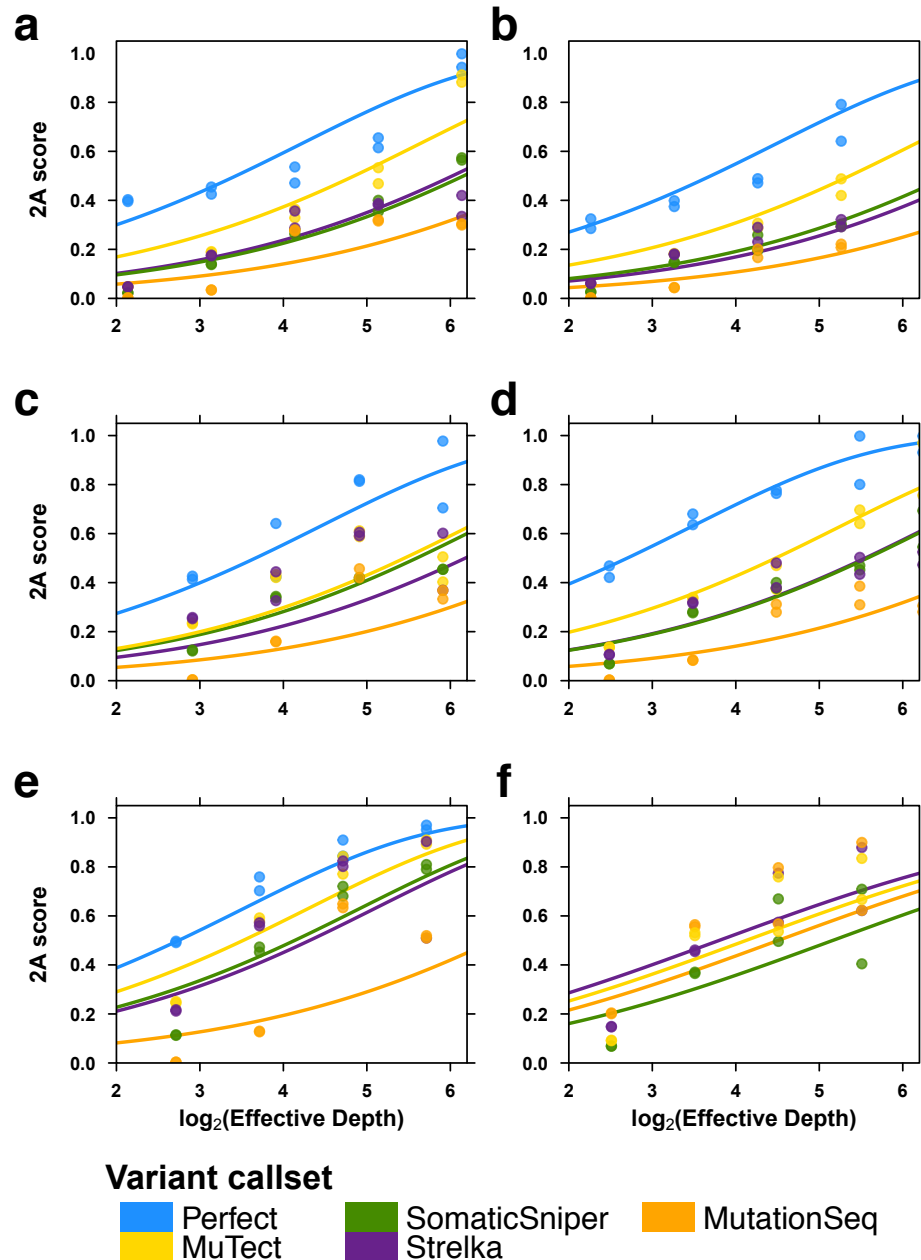

| PhyloWGS                                                                   | DPClust                                                    |
|----------------------------------------------------------------------------|------------------------------------------------------------|
| Assigns CNAs to clusters                                                   | Does not assign CNAs to clusters                           |
| Estimates multiplicity of mutations during Markov chain Monte-Carlo (MCMC) | Uses most likely multiplicity of each mutation during MCMC |
| Reconstructs phylogenies during                                            | Reconstructs phylogenies after MCMC                        |
| Estimates purity from SNVs and CNAs                                        | Estimates purity from CNAs                                 |

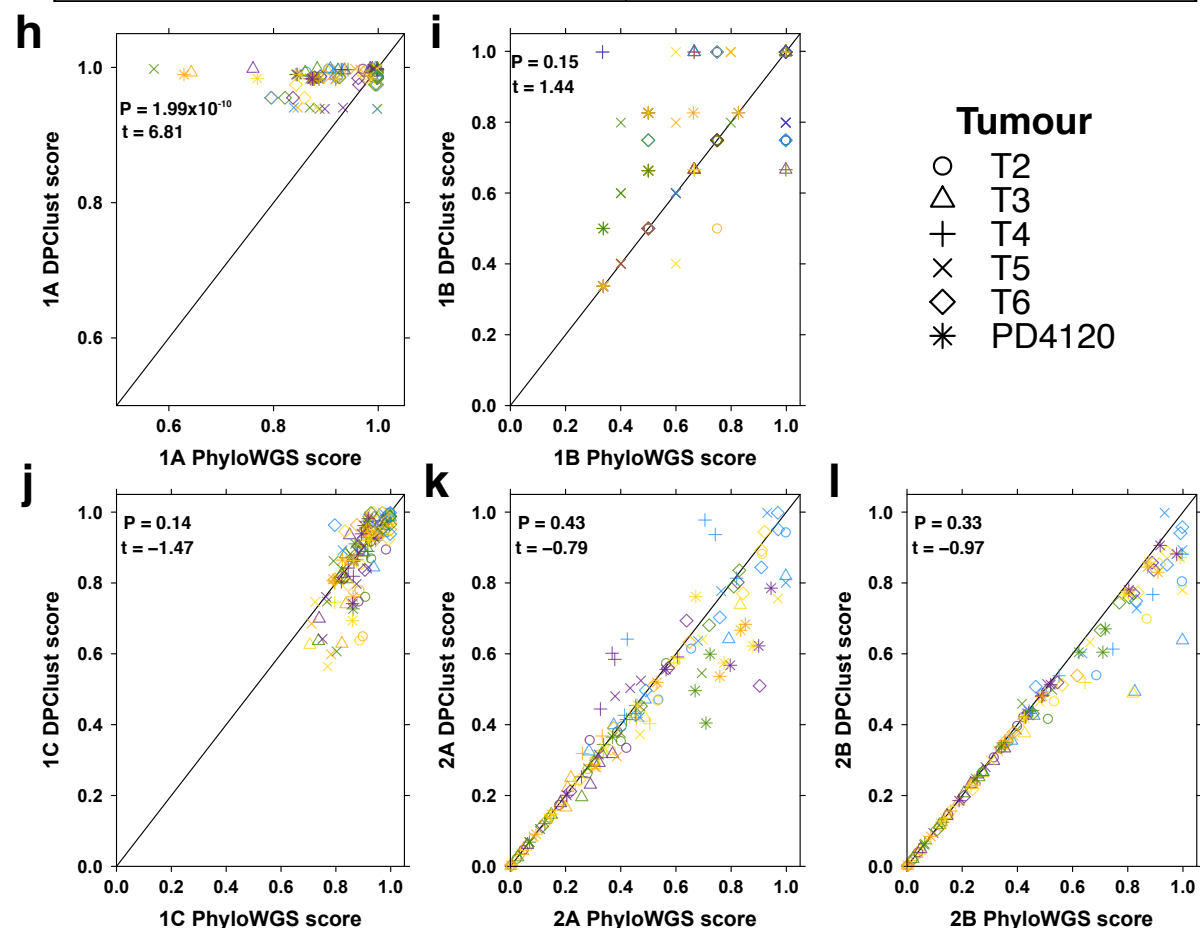

Supplement: NIHMS1543826-supplement-sup_fig5.pdf [file NIHMS1543826-supplement-sup_fig5.pdf]
